# Supplementary material for: Utility of Comprehensive Genomic Profiling Tests for Patients with Incurable Pancreatic Cancer in Clinical Practice
Source: MDPI journal article supplement (doi:10.3390/cancers15030970), 2023-02-03
Supplement: s1 [file s1]

Sup. Figure S1

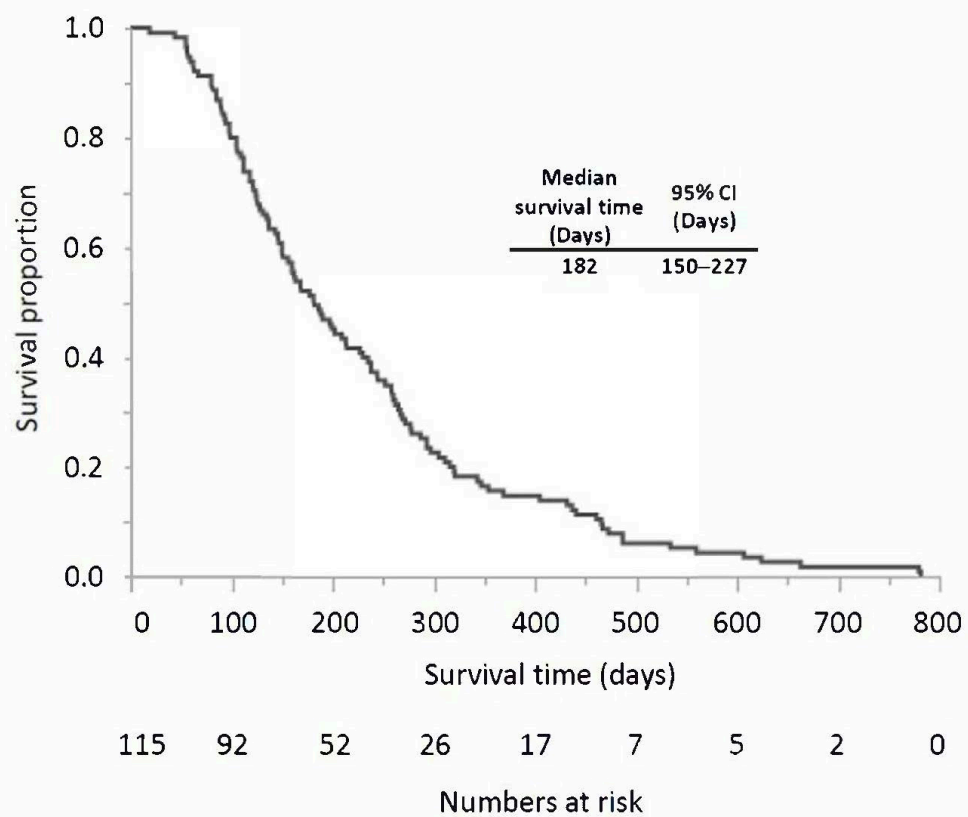

**Supplementary Figure S1**

Kaplan–Meier survival curves for survival after submission of comprehensive genomic profiling (CGP) tests. CI, confidence interval.

Sup. Figure S2

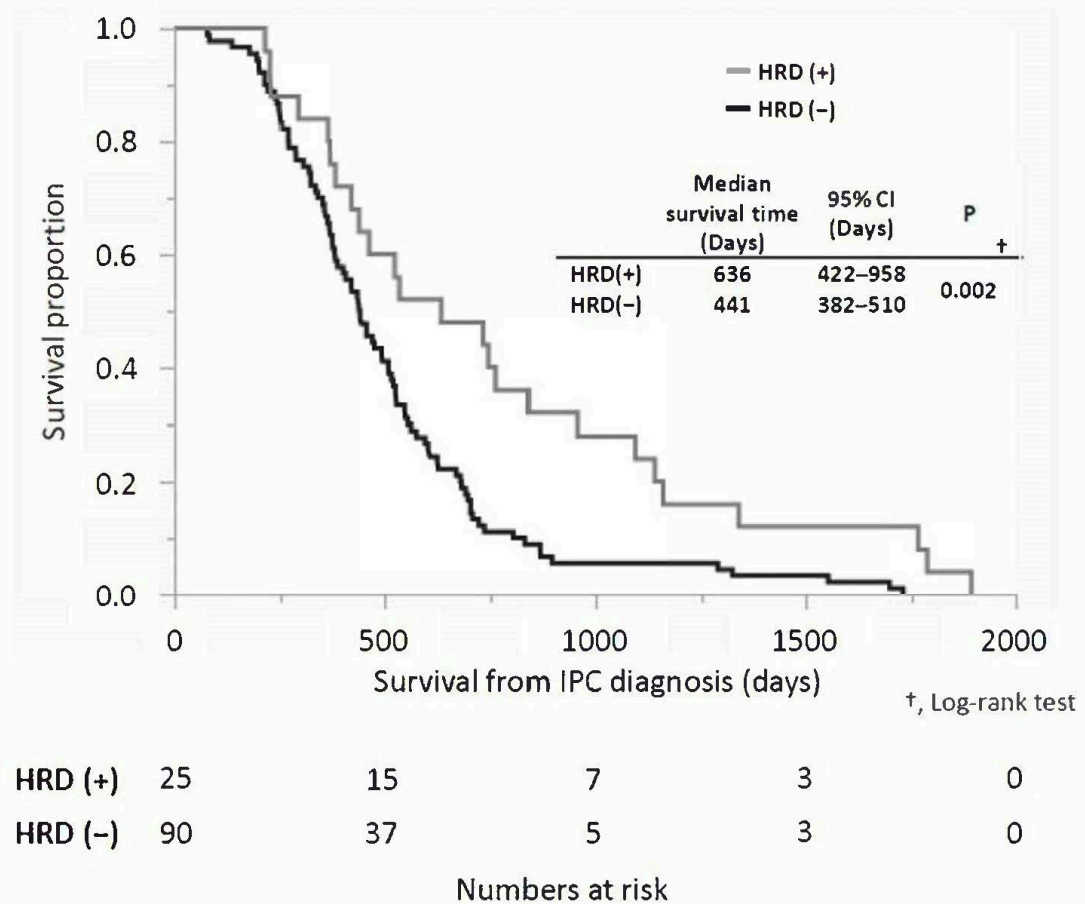

**Supplementary Figure S2**

Comparison of survival from IPC diagnosis between the patients who had homologous recombination deficiency

(HRD)-related genetic mutations (HRD (+)) and those who did not (HRD (-)).

IPC, incurable pancreatic cancer; OS, overall survival; HRD, homologous recombination deficiency; CI,

confidence interval.
